# Supplementary material for: Observing intermittent biological productivity and vertical carbon transports during the spring transition with BGC Argo floats in the western North Pacific
Source: Copernicus journal article supplement (doi:10.5194/bg-2022-9), 2022-01-13
Supplement: Supplementary file [file bg-2022-9-AC1-supplement.pdf]

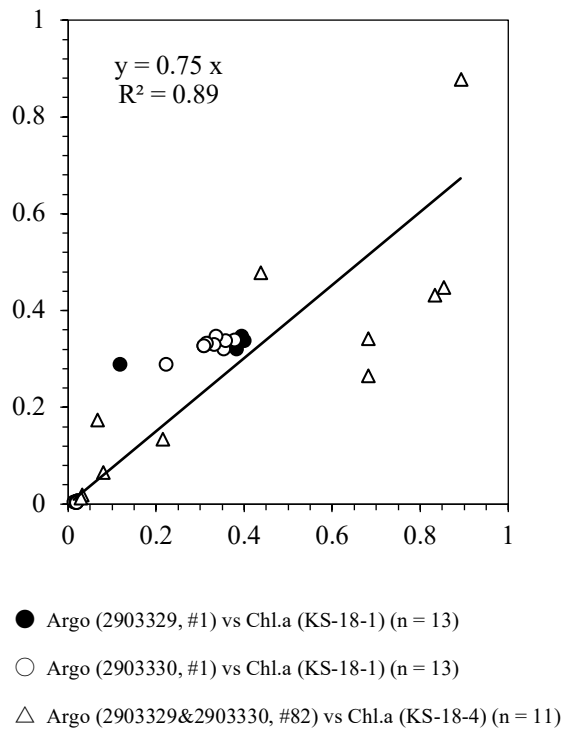

Supplement figure: The relationship between fluorescence measured by floats and Chl *a* concentrations from water samples. Black and open circles show measurements from the first profiles of Argo floats 2903329 and 2903330 vs Chl *a* concentrations. Open triangles show measurements from the final profile of Argo float 2903329 and 2903330 vs Chl *a* concentrations. The dashed line shows the linear fit.
